# Supplementary material for: Controllable synthesis and tunable luminescence properties of Y2(WO4)3:Ln3+ (Ln = Eu, Yb/Er, Yb/Tm and Yb/Ho) 3D hierarchical architectures
Source: Royal Society of Chemistry journal article supplement (doi:10.1039/c2dt30221g), 2012-01-01
Supplement: c2dt30221g.pdf [file c2dt30221g.pdf]

## Supporting Information

### **Controllable synthesis and tunable luminescence properties of $\text{Y}_2(\text{WO}_4)_3:\text{Ln}^{3+}$ (Ln = Eu, Yb/Er, Yb/Tm and Yb/Ho ) 3D hierarchical architectures**

**Shaohua Huang,<sup>a</sup> Xiao Zhang,<sup>a</sup> Liuzhen Wang,<sup>a</sup> Ling Bai,<sup>a</sup> Jie Xu,<sup>a</sup> Lin Wang,<sup>a</sup> Chunxia Li,<sup>b</sup> and Piaoping Yang<sup>\*a</sup>**

<sup>a</sup> Key Laboratory of Superlight Materials and Surface Technology, Ministry of Education, Harbin Engineering University, Harbin 150001, P. R. China

<sup>b</sup> State Key Laboratory of Rare Earth Resource Utilization, Changchun Institute of Applied Chemistry, Chinese Academy of Sciences, Changchun 130021, P. R. China

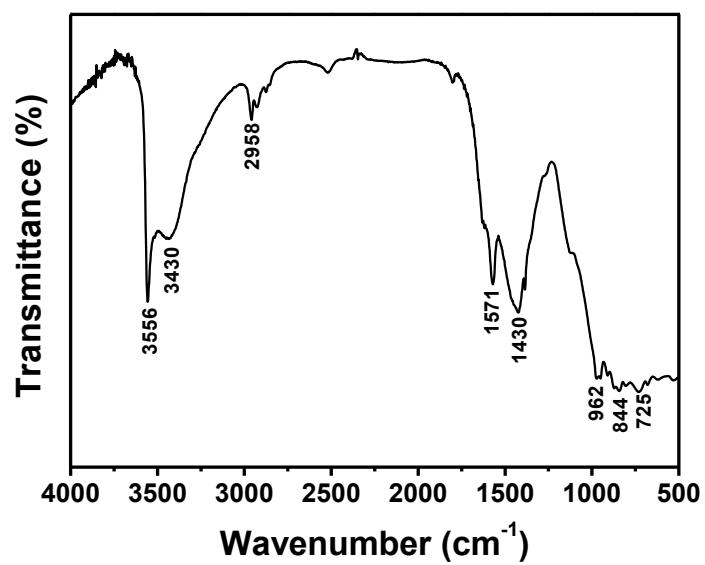

**Fig. S1.** FT-IR spectrum of the as-prepared yttrium tungstate precursor.

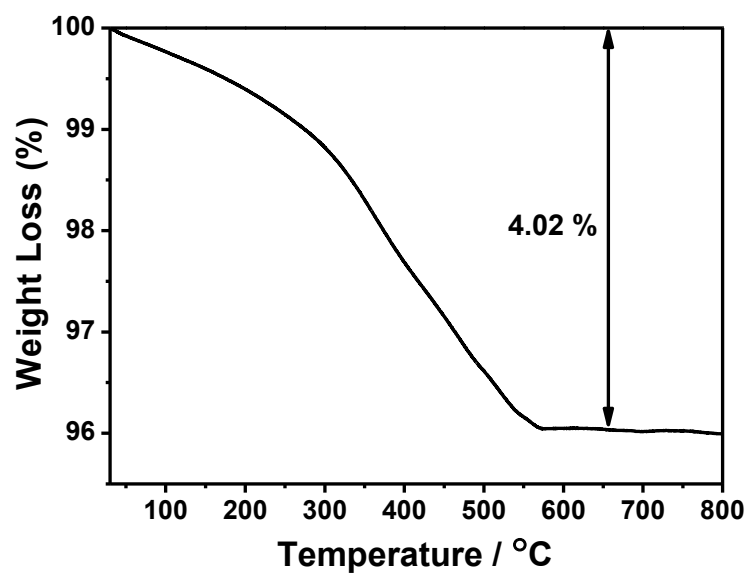

**Fig. S2.** TGA curves of the as-prepared yttrium tungstate precursor.

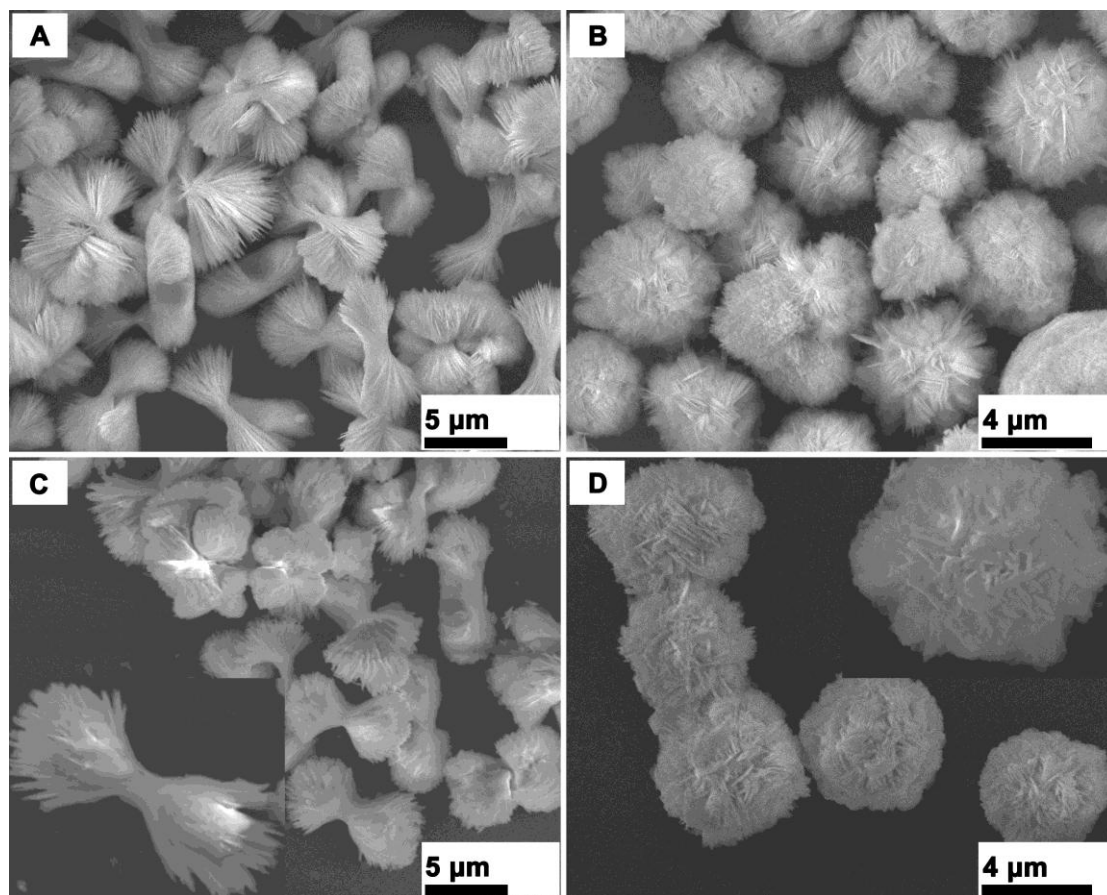

**Fig. S3.** SEM images of the as-prepared yttrium tungstate precursors prepared with (A) 0.5 mmol, (B) 0.75 mmol SDBS, and SEM images of Y<sub>2</sub>(WO<sub>4</sub>)<sub>3</sub> prepared with (C) 0.5 mmol, (D) 0.75 mmol samples after annealed at 800 °C for 2 h.
